# Supplementary material for: The importance of heat effects in the methanol to hydrocarbons reaction over ZSM-5: on the role of mesoporosity on catalyst performance
Source: Royal Society of Chemistry journal article supplement (doi:10.1039/c6cy00654j), 2016-01-01
Supplement: c6cy00654j1.pdf [file c6cy00654j1.pdf]

Supporting information to

## **The importance of heat effects in the Methanol to Hydrocarbons reaction over ZSM-5: on the role of mesoporosity on catalyst performance**

Irina Yarulina<sup>a</sup>, Freek Kapteijn<sup>a</sup> and Jorge Gascon<sup>a,\*</sup>

<sup>a</sup>Catalysis Engineering, Department of Chemical Engineering, Faculty of Applied Sciences, Delft University of Technology, Julianalaan 136, 2628 BL Delft, The Netherlands

## Experimental Section

### Catalytic Tests

The product mixture was analyzed online with an Interscience CompactGC equipped with a 15 m capillary RTX-1 (1% diphenyl-, 99% dimethylpolysiloxane) column and a flame ionization detector.

Conversion, selectivities and yields were calculated on a molar carbon basis. Thus, conversion was defined as the carbon-based fraction of light oxygenates (methanol and dimethyl ether) consumed during the reaction:

$$X = \frac{n_{C,MeOH_{in}} - n_{C,MeOH_{out}} - 2 \cdot n_{C,DME_{out}}}{n_{C,MeOH_{in}}} \cdot 100\% \quad (1)$$

the selectivity towards produced hydrocarbons was calculated according to the carbon number of the product. I.e. for ethylene (2) and propylene (3):

$$S_{ethylene} = \frac{2 \cdot n_{C_2H_4}}{n_{C,MeOH_{in}} - n_{C,oxy_{out}}} \cdot 100\% \quad (2)$$

$$S_{propylene} = \frac{3 \cdot n_{C_3H_6}}{n_{C,MeOH_{in}} - n_{C,oxy_{out}}} \cdot 100\% \quad (3)$$

and the yield of a component  $i$  was defined from its selectivity and methanol conversion:

$$Y_i = \frac{S_i \cdot X}{100} \quad (4)$$

Note that the selectivities and yields presented in the time-on-stream graphs (main text) are the instantaneous values. The bar graphs (Figures S2 and S3) represent the integral values over the whole experiment.

## Tables

**Table S1.** Detailed characteristics of the catalyst bed in dilution experiments performed at  $WHSV = 8 \text{ h}^{-1}$ ,  $m_{catalyst} = 0.5 \text{ g}$ ,  $\text{MeOH:N}_2 = 1:1$  and reactor ID 9 mm.

| ZSM-5 :SiC<br>(wt/wt) | ZSM-5 : SiC<br>(vol / vol) | $L_{bed}$<br>(cm) | $F(\text{MeOH})$<br>( $\text{mmol min}^{-1}$ ) |
|-----------------------|----------------------------|-------------------|------------------------------------------------|
| 1:0                   | 1:0                        | 1.4               | 2.1                                            |
| 1:3                   | 1:0.9                      | 2.7               | 2.1                                            |
| 1:6                   | 1:1.8                      | 3.9               | 2.1                                            |

**Table S2.** Detailed characteristics of the catalyst bed and conditions in 3 TC experiments ( $WHSV = 4 \text{ h}^{-1}$ ,  $\text{MeOH:N}_2 = 1:1$ , reactor ID 9 mm).

| Catalyst    | $L_{bed}$<br>(cm) | $m_{cat}$<br>(g) | $m_{SiC}$<br>(g) | $F(\text{MeOH})$<br>( $\text{mmol min}^{-1}$ ) |
|-------------|-------------------|------------------|------------------|------------------------------------------------|
| ZSM-5       | 5                 | 1.75             | 0                | 3.6                                            |
| ZSM-5 + SiC | 5                 | 0.63             | 3.78             | 1.3                                            |
| Meso-ZSM-5  | 5                 | 1.44             | 0                | 3.0                                            |

## Figures

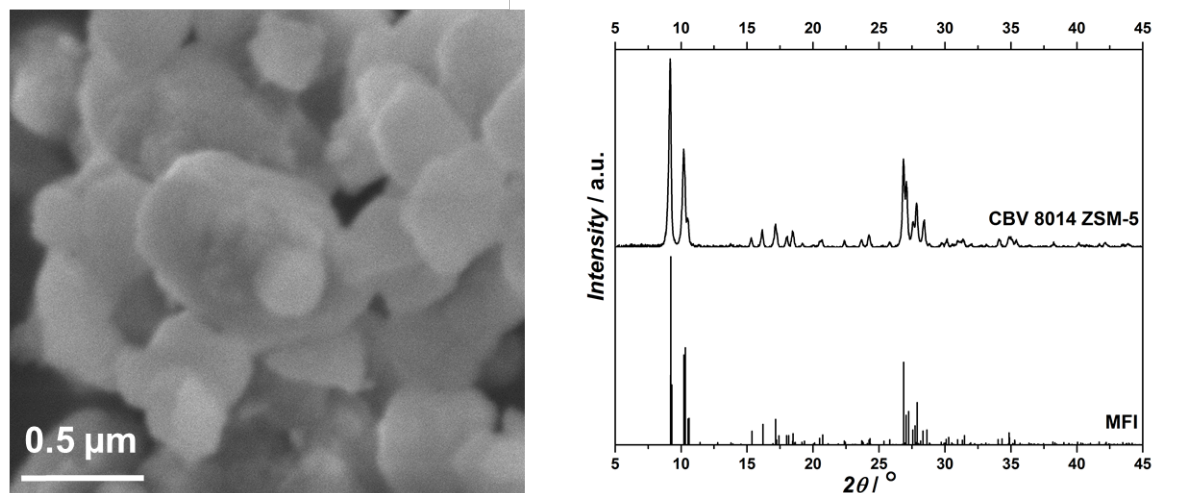

Figure S1. (Left) SEM picture of parent ZSM-5 material. (Right) XRD patterns of parent ZSM-5 and reference MFI structure.

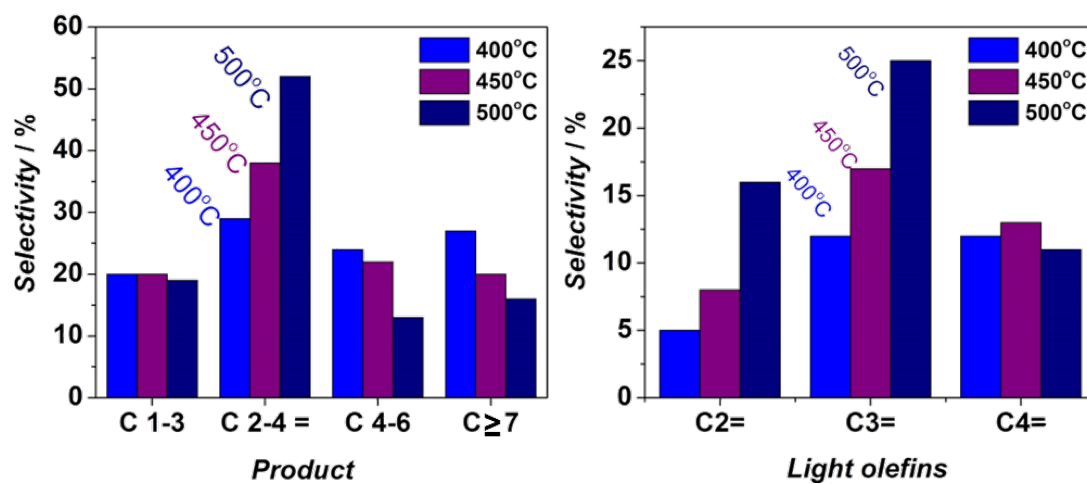

Figure S2. (Left) Product selectivities obtained over ZSM-5 tested at different temperatures. (Right) Light olefins selectivities obtained over ZSM-5 tested at different temperatures. Values are integral selectivities over the experiment duration.

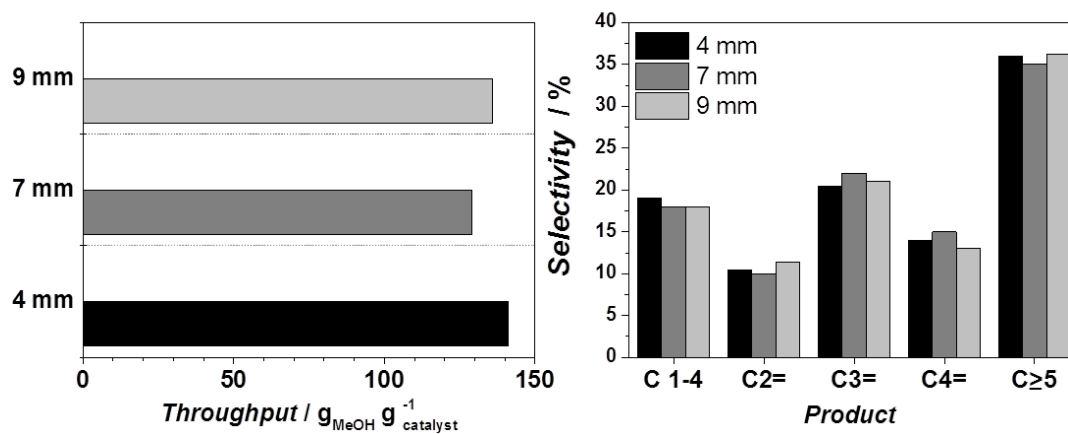

Figure S3. (Left) Catalyst lifetime (throughput) obtained over undiluted ZSM-5 tested in reactors with different i.d. (4, 7, 9 mm) at 470 °C.  $L_{\text{bed}} = 5 \text{ cm}$ ,  $WHSV = 4 \text{ h}^{-1}$ ,  $\text{MeOH}:\text{N}_2=1:1$ . (Right) Corresponding integral product selectivities.

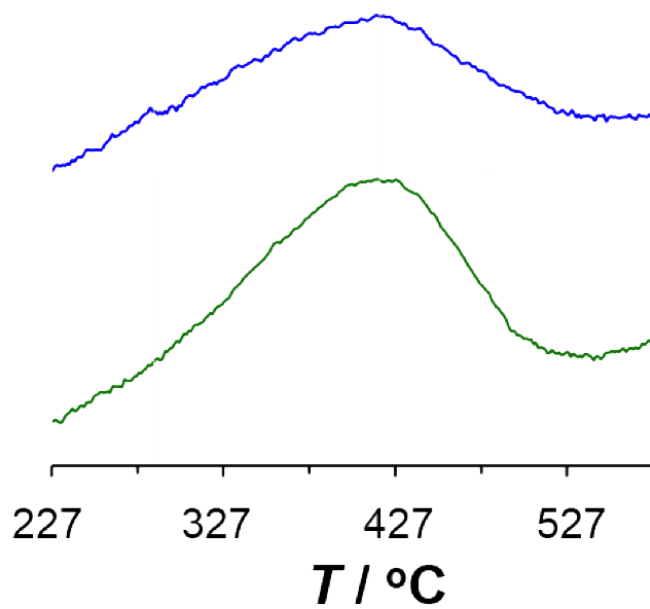

Figure S4.  $\text{NH}_3$  TPD profiles of parent ZSM-5 (*green*) and desilicated and acid washed ZSM-5 (*blue*).

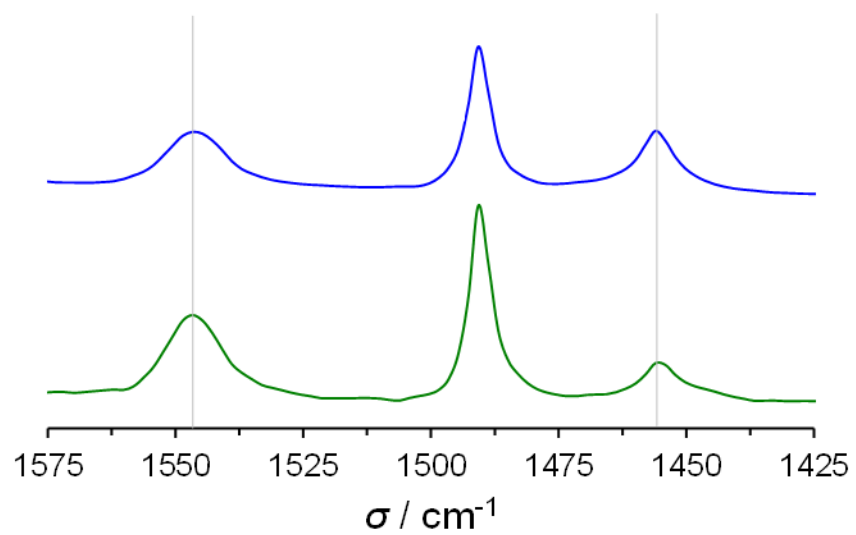

Figure S5. IR spectra of parent ZSM-5 (*green*) and desilicated and acid washed ZSM-5 (*blue*) upon pyridine adsorption.

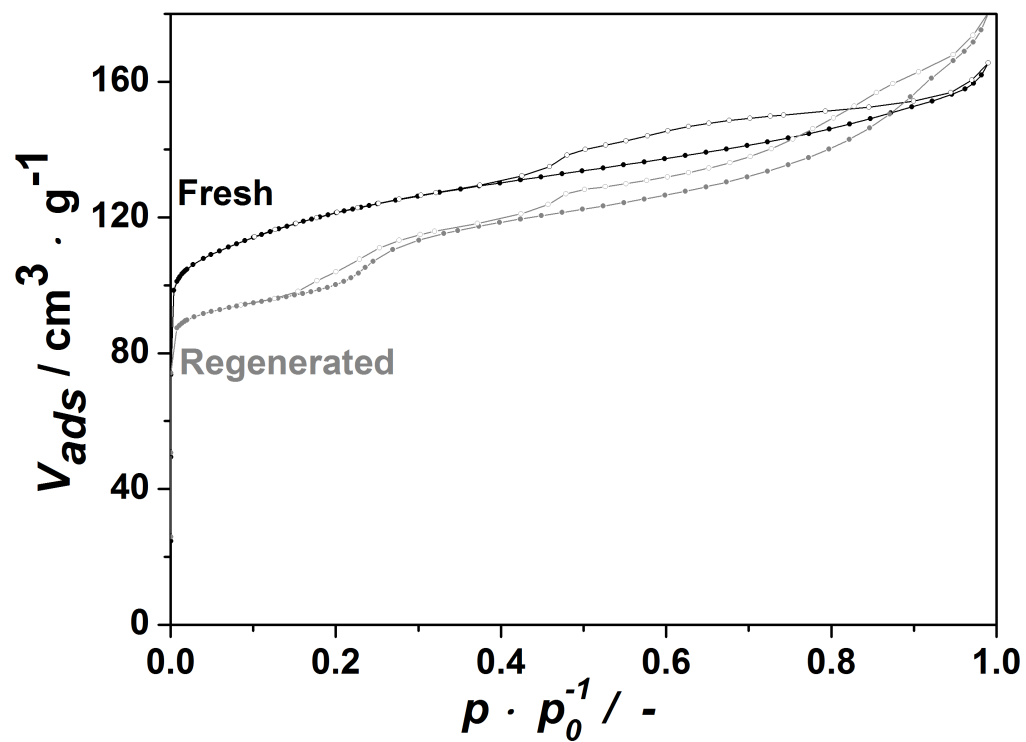

Figure S6. N<sub>2</sub> physisorption isotherms at 77 K of fresh ZSM-5 and regenerated sample after three catalytic runs.
